# Supplementary material for: An ampyrone based azo dye as pH-responsive and chemo-reversible colorimetric fluorescent probe for Al3+ in semi-aqueous medium: implication towards logic gate analysis
Source: Royal Society of Chemistry journal article supplement (doi:10.1039/c7nj04194b), 2017-12-26

## Supporting Information

### **An Ampyrone based azo dye as pH-responsive and chemo-reversible colorimetric fluorescent probe for Al<sup>3+</sup> in semi-aqueous medium: Implication towards logic gate analysis**

Gaurav Bartwal<sup>a</sup>, Komal Aggarwal<sup>a</sup> and Jitender M. Khurana<sup>a,\*</sup>

<sup>a</sup>*Department of Chemistry, University of Delhi, Delhi-110007, India*

*\*Corresponding author. Tel.: +91 11 27667772; fax: +91 11 27667624*

*E-mail addresses: [jmkhurana1@yahoo.co.in](mailto:jmkhurana1@yahoo.co.in)*

## List of Supporting Information

| Figures   | List                                                                                                     | Page |
|-----------|----------------------------------------------------------------------------------------------------------|------|
| Figure S1 | Mass spectra of <b>1</b> -Al <sup>3+</sup> Complex                                                       | 3    |
| Figure S2 | <sup>1</sup> H-NMR spectrum (400 MHz, DMSO-d <sub>6</sub> ) of <b>1</b> in presence of aluminium (5 eq.) | 4    |
| Figure S3 | <sup>13</sup> C NMR spectrum (100 MHz, DMSO-d <sub>6</sub> ) of <b>1</b> in presence of acid             | 5    |
| Figure S4 | <sup>1</sup> H-NMR spectrum (400 MHz, DMSO-d <sub>6</sub> ) of <b>1</b>                                  | 6    |
| Figure S5 | <sup>13</sup> C-NMR spectrum (100 MHz, DMSO-d <sub>6</sub> ) of <b>1</b>                                 | 7    |
| Figure S6 | IR spectrum of <b>1</b>                                                                                  | 8    |
| Figure S7 | HR-MS spectrum of <b>1</b>                                                                               | 9    |

**Figure S1: Mass spectra of 1-Al<sup>3+</sup> Complex**

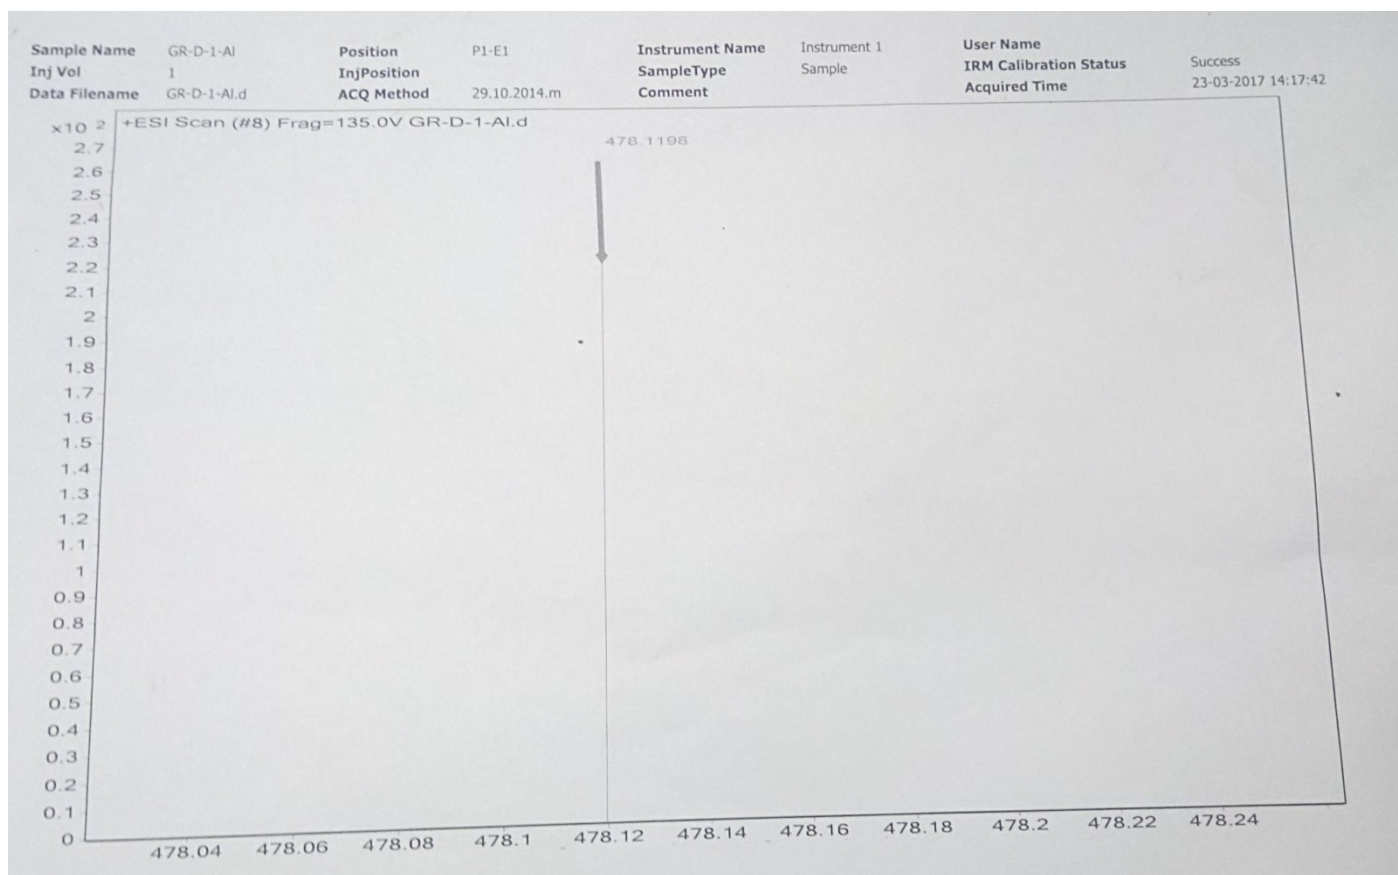

**Figure S2:**  $^1\text{H}$  NMR spectrum (400 MHz, DMSO- $d_6$ ) of **1** in presence of Aluminium (5 eq.)

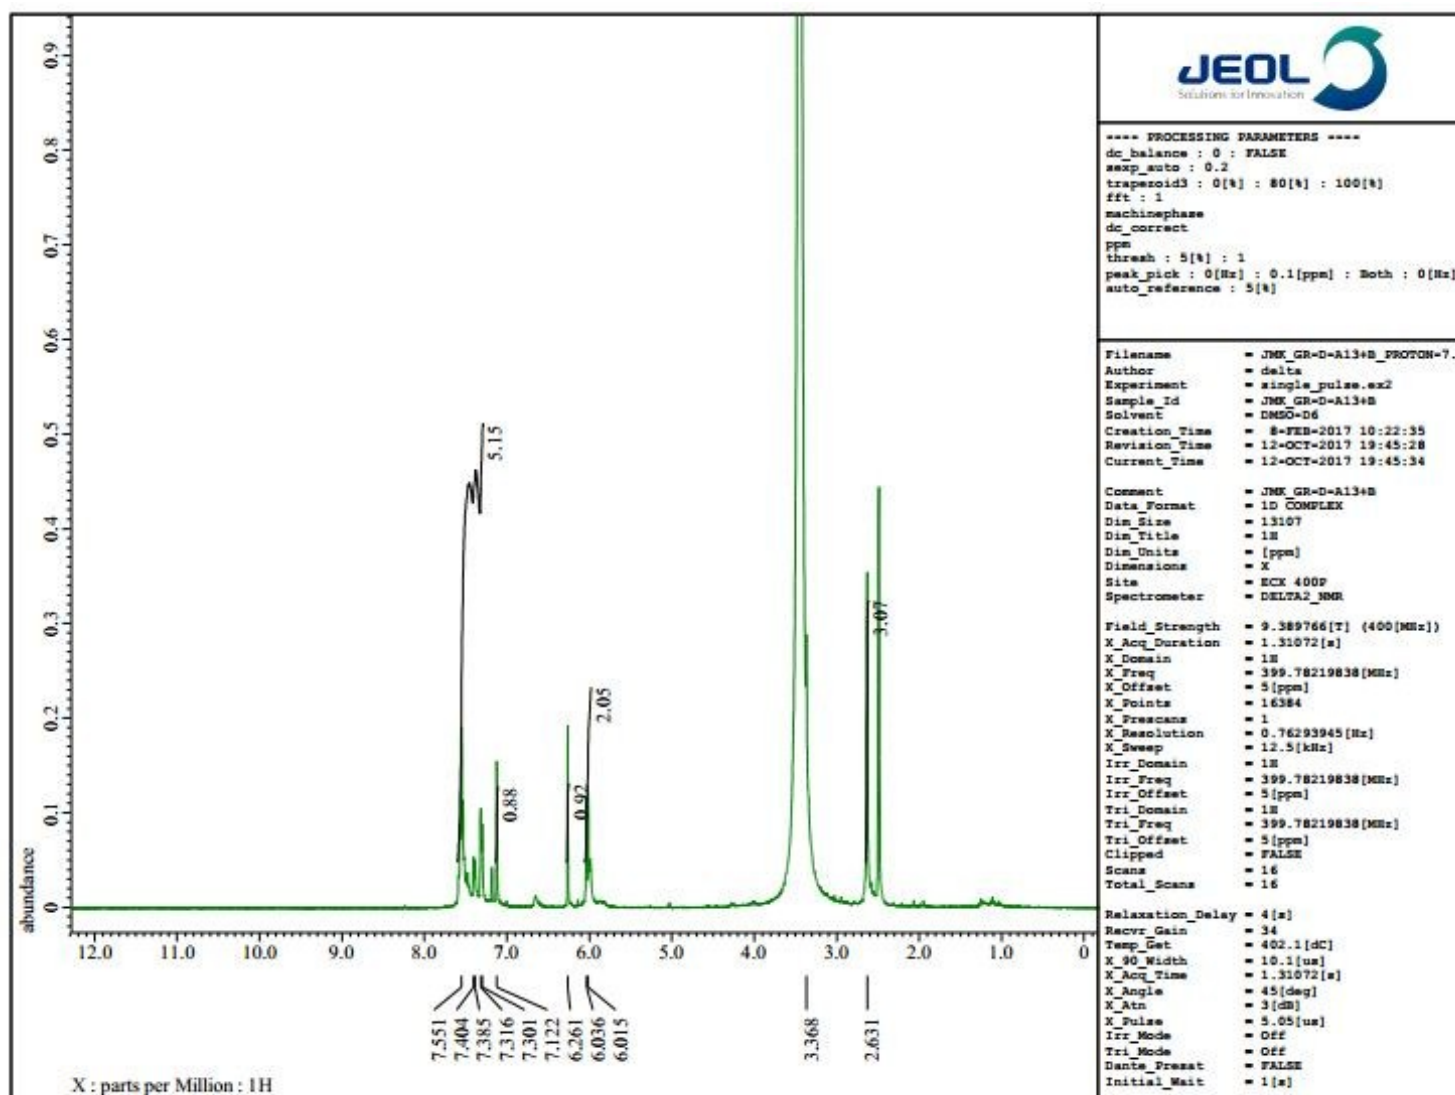

**Figure S3:**  $^{13}\text{C}$  NMR spectrum (100 MHz, DMSO- $d_6$ ) of **1** in presence of acid

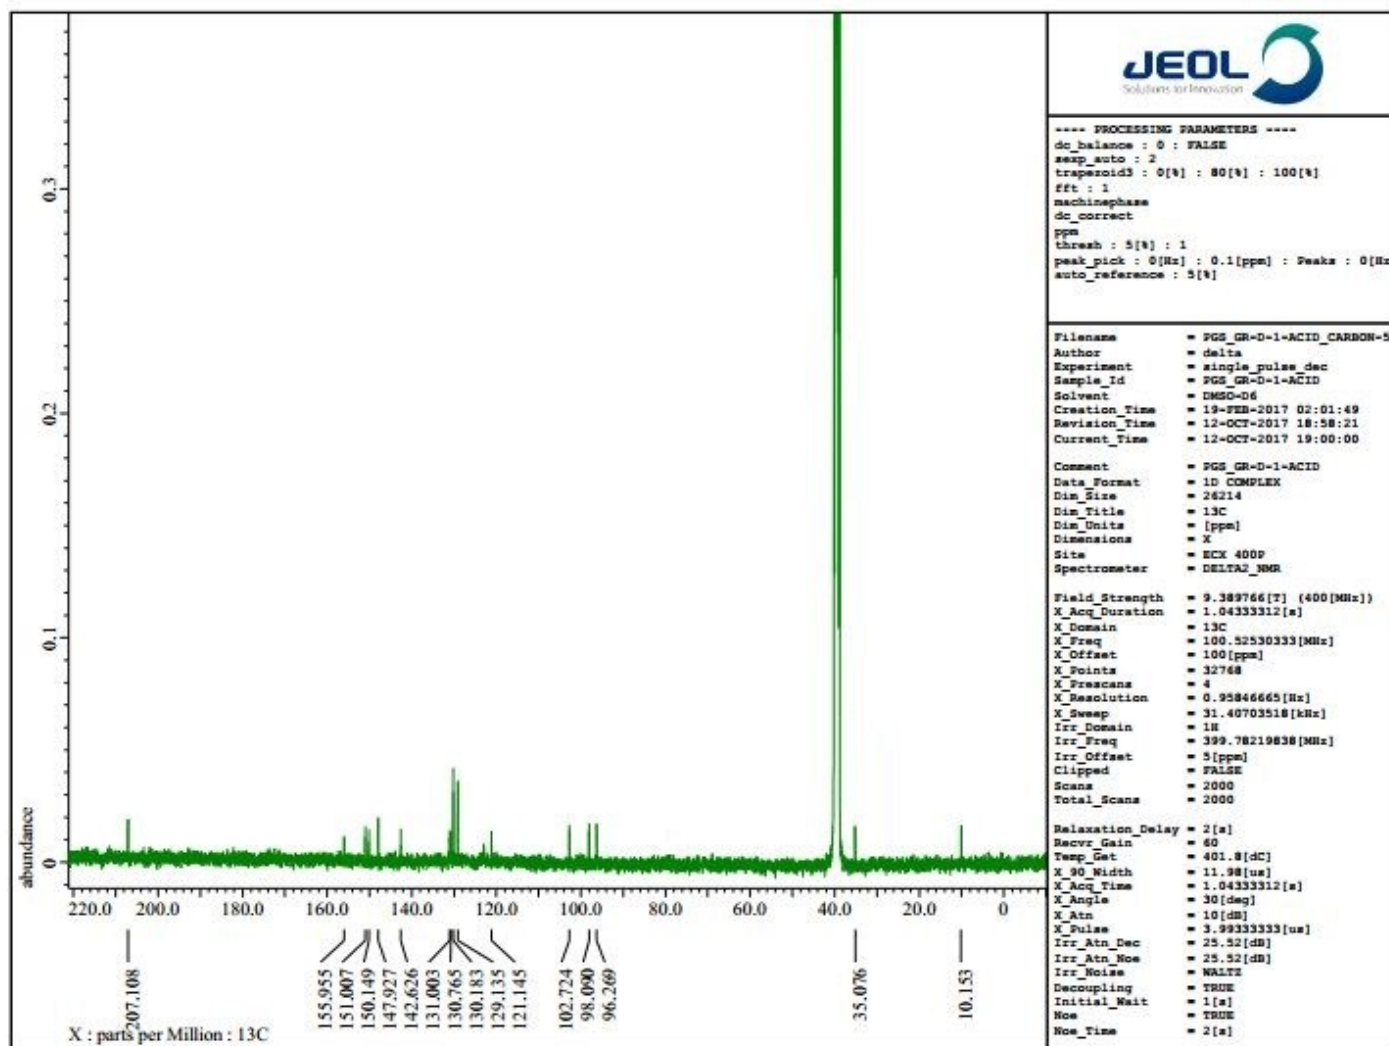

Figure S4:  $^1\text{H}$ -NMR spectrum (400 MHz, DMSO- $d_6$ ) of **1**

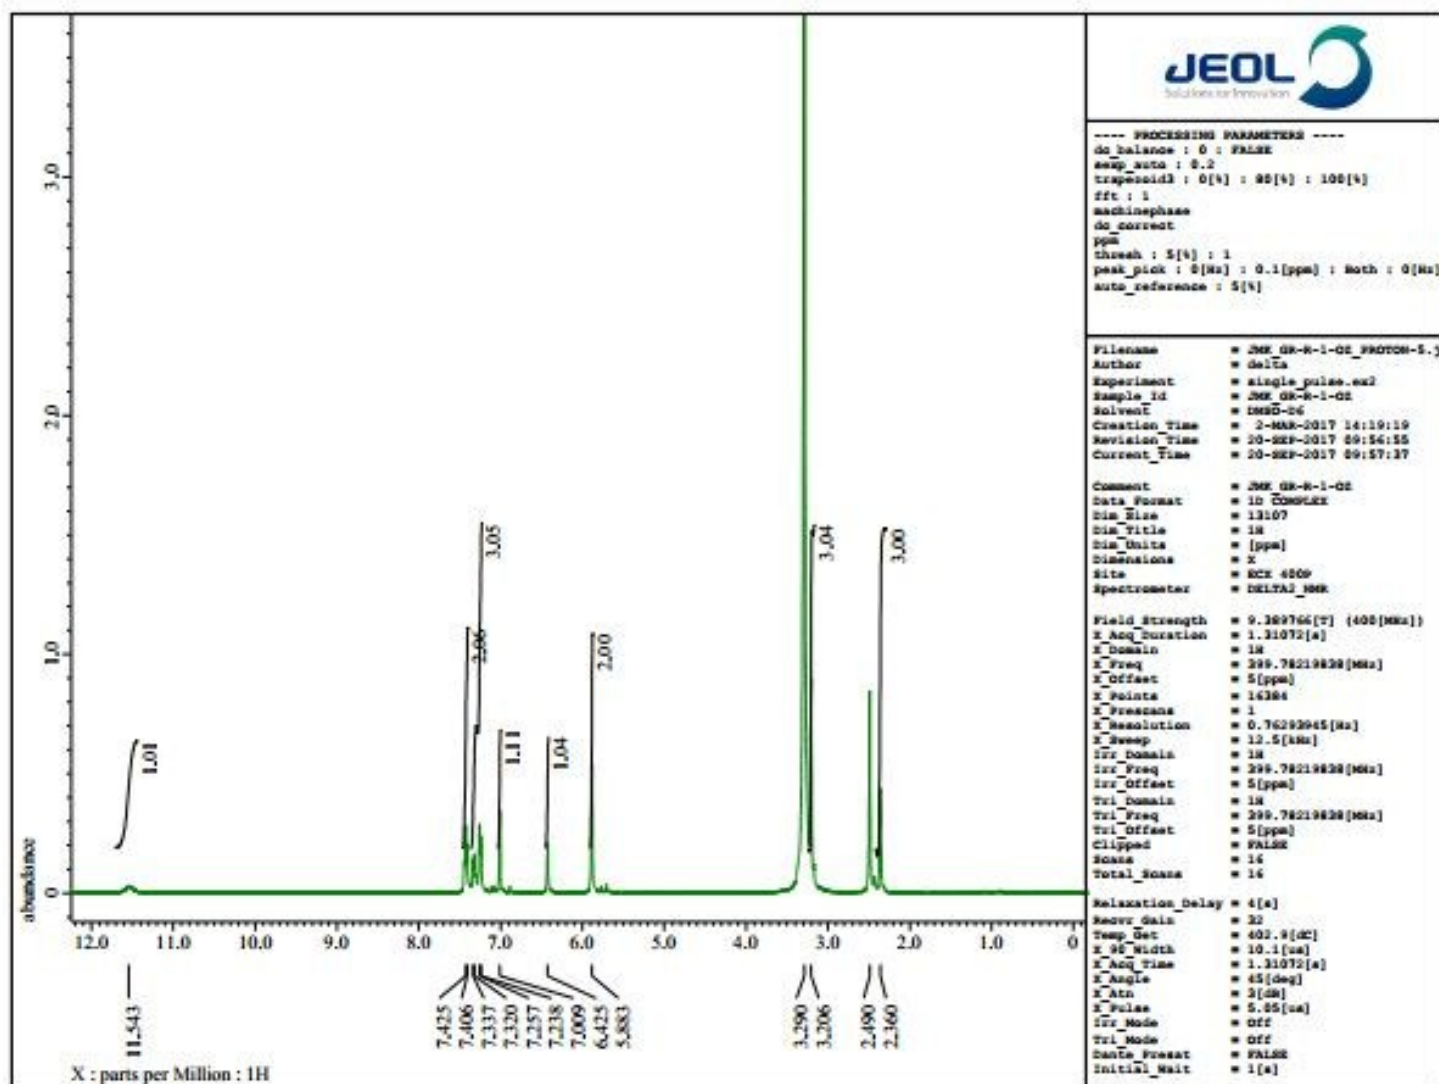

Figure S5:  $^{13}\text{C}$ -NMR spectrum (100 MHz, DMSO- $d_6$ ) of 1

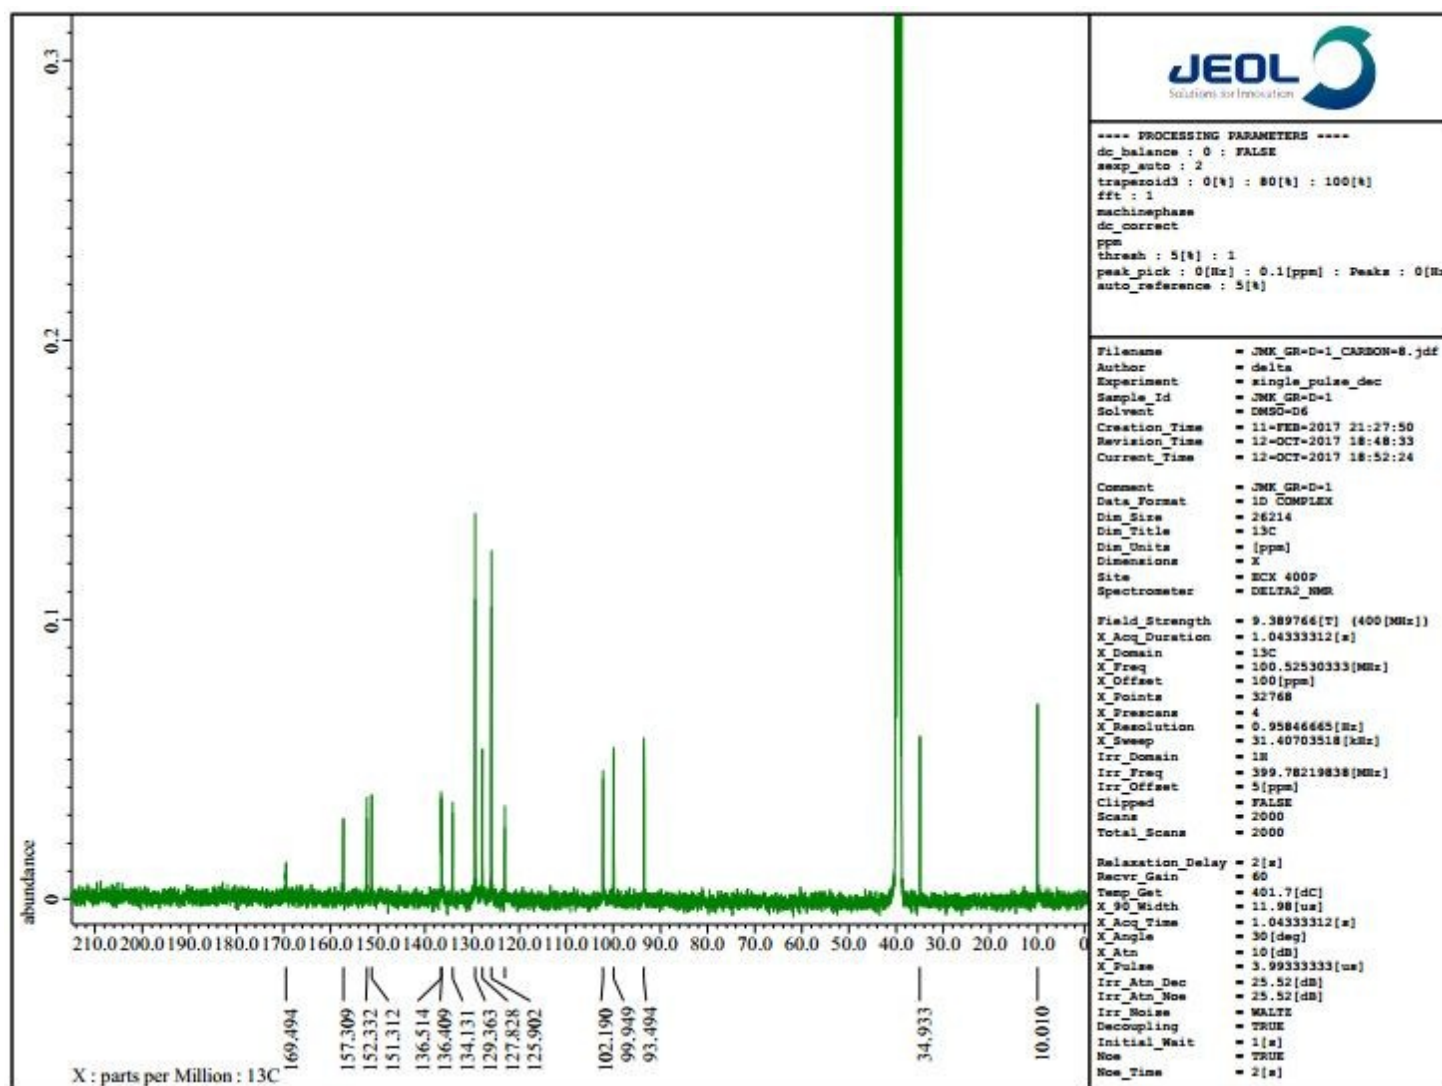



**Figure S6:** IR spectrum of **1**

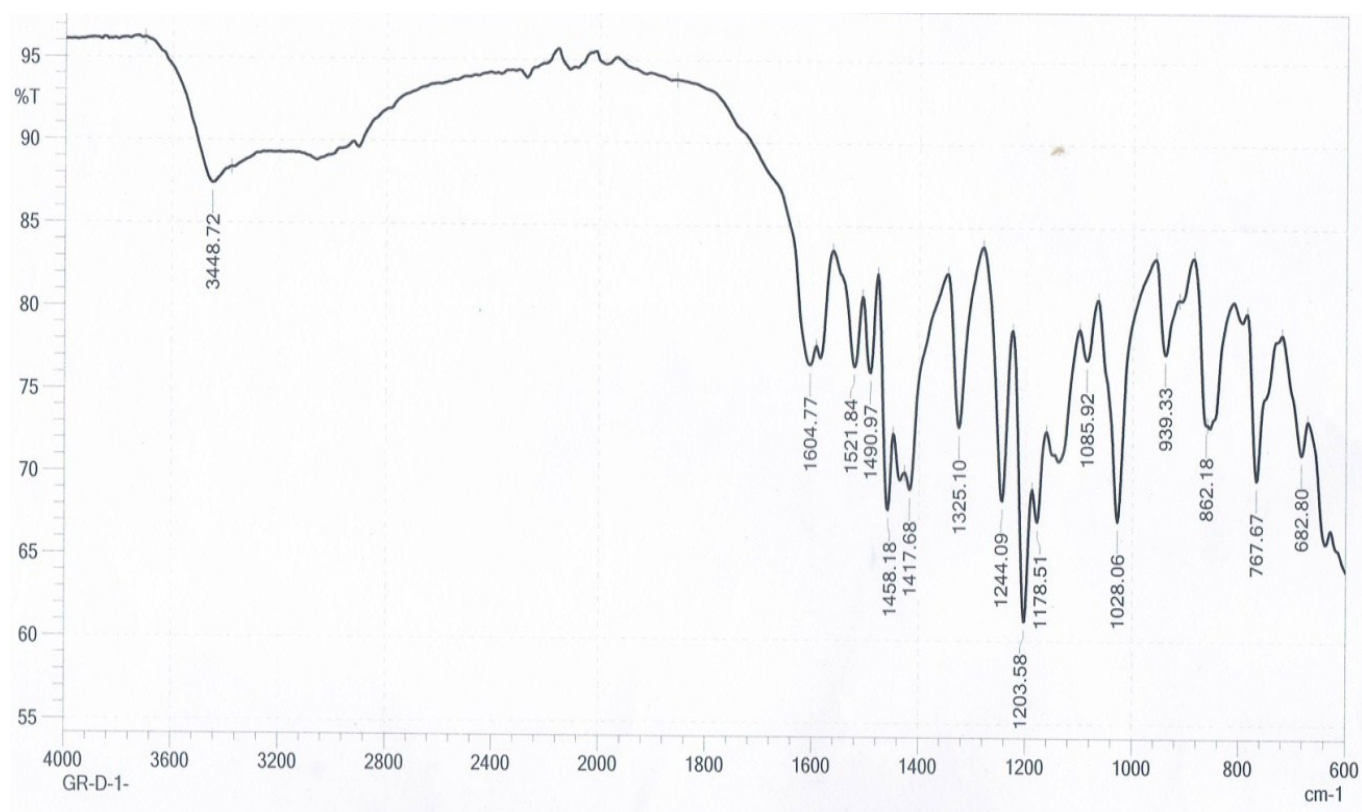



Figure S7: HR-MS spectrum of 1

| Compound Label       | <i>m/z</i> | RT | Algorithm                 | Mass     |
|----------------------|------------|----|---------------------------|----------|
| Cpd 6: C18 H16 N4 O4 | 353.1241   | 11 | Find by Molecular Feature | 352.1168 |

MFE MS Spectrum

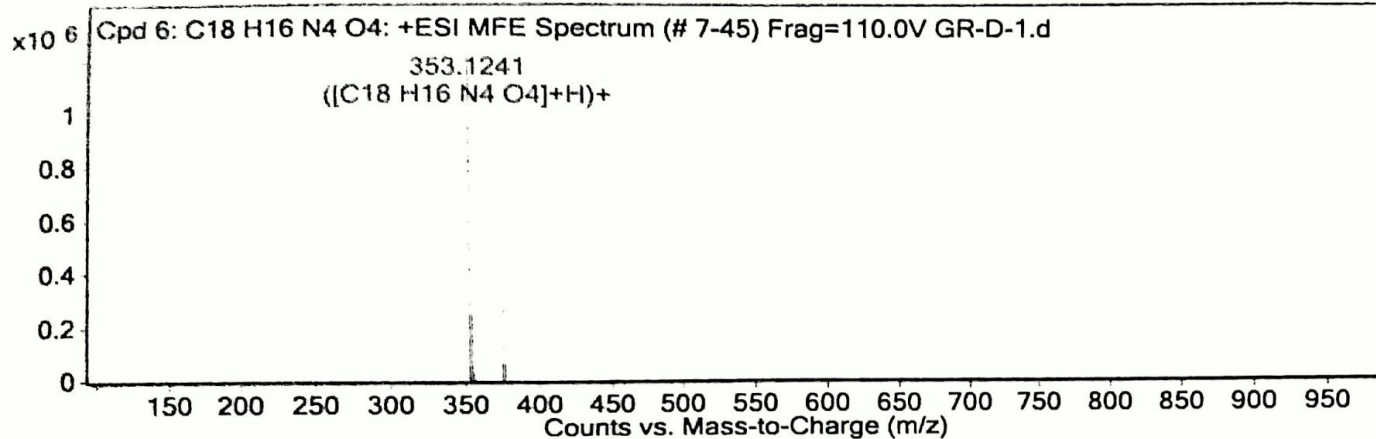

MFE MS Zoomed Spectrum

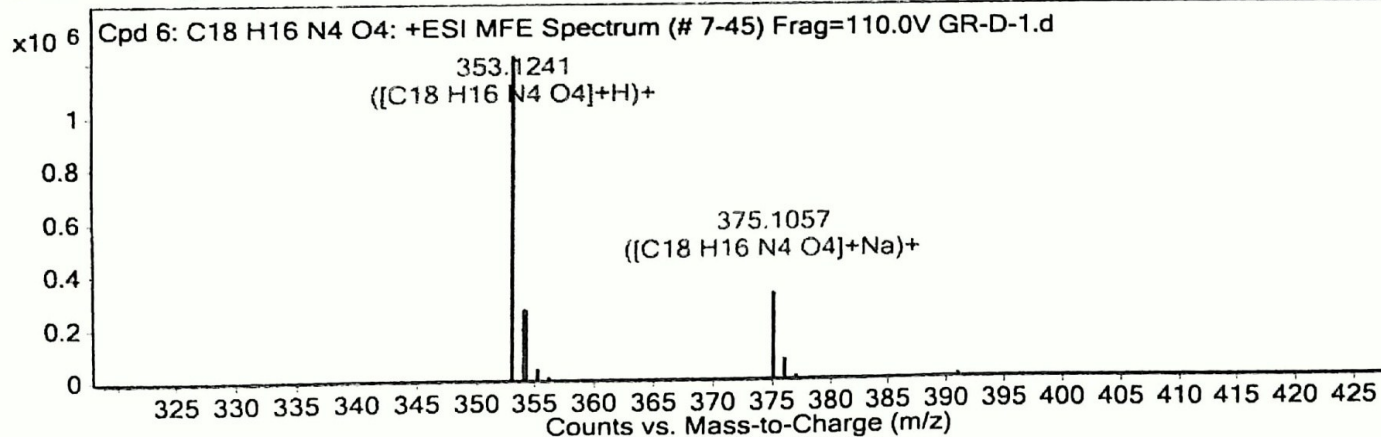

Supplement: c7nj04194b1.pdf [file c7nj04194b1.pdf]
